# Supplementary material for: Quantifying Spatial Heterogeneity of Tumor-Infiltrating Lymphocytes to Predict Survival of Individual Cancer Patients
Source: MDPI journal article supplement (doi:10.3390/jpm12071113), 2022-07-07
Supplement: s1 [file s1]

A

Binary TIL maps

|         |         |               |          |          |          |                         |                   |                    |                      |           |                 |         |            |       |                                                                                                 |
|---------|---------|---------------|----------|----------|----------|-------------------------|-------------------|--------------------|----------------------|-----------|-----------------|---------|------------|-------|-------------------------------------------------------------------------------------------------|
| 0.000   | 0.000   | 2.174         | 4.348    | 4.348    | 4.348    | 4.348                   | 4.348             | 4.348              | 4.348                | 4.348     | 4.348           | 6.522   | 4.348      | acc   | <div><div></div><div>10</div><div>8</div><div>6</div><div>4</div><div>2</div><div>0</div></div> |
| 0.559   | 0.559   | 0.559         | 0.000    | 0.000    | 0.000    | 0.000                   | 0.000             | 0.000              | 0.000                | 0.000     | 0.000           | 0.000   | 0.000      | blca  |                                                                                                 |
| 0.188   | 0.188   | 0.658         | 0.940    | 0.940    | 0.940    | 0.940                   | 0.940             | 0.940              | 0.940                | 0.940     | 0.846           | 0.940   | 1.692      | 0.846 |                                                                                                 |
| 0.000   | 0.000   | 0.000         | 0.377    | 0.377    | 0.377    | 0.377                   | 0.377             | 0.377              | 0.377                | 0.377     | 0.377           | 0.377   | 0.755      | 0.377 |                                                                                                 |
| 0.461   | 0.461   | 0.691         | 0.691    | 0.691    | 0.691    | 0.691                   | 0.691             | 0.691              | 0.691                | 0.691     | 9.677           | 9.677   | 9.908      | 9.677 |                                                                                                 |
| 0.000   | 0.000   | 0.000         | 0.000    | 0.000    | 0.000    | 0.000                   | 0.000             | 0.000              | 0.000                | 0.000     | 0.000           | 0.000   | 0.000      | 0.000 |                                                                                                 |
| 0.000   | 0.000   | 0.000         | 0.446    | 0.446    | 0.446    | 0.446                   | 0.446             | 0.446              | 0.446                | 0.446     | 0.446           | 0.670   | 0.446      | hnsc  |                                                                                                 |
| 0.000   | 0.000   | 0.000         | 0.000    | 0.000    | 0.000    | 0.000                   | 0.000             | 0.000              | 0.000                | 0.000     | 0.000           | 0.000   | 0.000      | 0.000 |                                                                                                 |
| 0.000   | 0.000   | 0.000         | 0.549    | 0.549    | 0.549    | 0.549                   | 0.549             | 0.549              | 0.549                | 0.549     | 0.549           | 0.549   | 0.549      | 0.549 |                                                                                                 |
| 0.428   | 0.428   | 0.428         | 0.214    | 0.214    | 0.214    | 0.214                   | 0.214             | 0.214              | 0.214                | 0.214     | 0.214           | 0.428   | 0.214      | luad  |                                                                                                 |
| 1.037   | 1.037   | 1.037         | 0.000    | 0.000    | 0.000    | 0.000                   | 0.000             | 0.000              | 0.000                | 0.000     | 0.000           | 0.000   | 0.000      | 0.000 | <div><div></div><div>10</div><div>8</div><div>6</div><div>4</div><div>2</div><div>0</div></div> |
| 1.149   | 1.149   | 1.149         | 1.149    | 1.149    | 1.149    | 1.149                   | 1.149             | 1.149              | 1.149                | 1.149     | 1.149           | 3.448   | 1.149      | meso  |                                                                                                 |
| 0.000   | 0.000   | 0.000         | 0.943    | 0.943    | 0.943    | 0.943                   | 0.943             | 0.943              | 0.943                | 0.943     | 0.943           | 2.830   | 0.943      | ov    |                                                                                                 |
| 0.000   | 0.000   | 0.000         | 0.000    | 0.000    | 0.000    | 0.000                   | 0.000             | 0.000              | 0.000                | 0.000     | 0.000           | 0.000   | 0.000      | paad  |                                                                                                 |
| 0.000   | 0.000   | 0.000         | 0.000    | 0.000    | 0.000    | 0.000                   | 0.000             | 0.000              | 0.000                | 0.000     | 2.500           | 2.500   | 2.500      | 2.500 |                                                                                                 |
| 0.641   | 0.641   | 1.282         | 0.641    | 0.641    | 0.641    | 0.641                   | 0.641             | 0.641              | 0.641                | 0.641     | 0.641           | 0.641   | 1.282      | 0.641 |                                                                                                 |
| 0.000   | 0.000   | 0.000         | 0.392    | 0.392    | 0.392    | 0.392                   | 0.392             | 0.392              | 0.392                | 0.392     | 0.392           | 0.392   | 1.176      | 0.392 |                                                                                                 |
| 0.231   | 0.231   | 0.462         | 0.231    | 0.231    | 0.231    | 0.231                   | 0.231             | 0.231              | 0.231                | 0.231     | 0.231           | 0.231   | 1.155      | 0.231 |                                                                                                 |
| 0.000   | 0.000   | 0.000         | 0.270    | 0.270    | 0.270    | 0.270                   | 0.270             | 0.270              | 0.270                | 0.270     | 0.270           | 0.270   | 0.539      | 0.270 |                                                                                                 |
| 10.738  | 10.738  | 10.738        | 0.000    | 0.000    | 0.000    | 0.000                   | 0.000             | 0.000              | 0.000                | 0.000     | 0.000           | 0.000   | 0.000      | 0.000 |                                                                                                 |
| 0.000   | 0.000   | 0.000         | 0.000    | 0.000    | 0.000    | 0.000                   | 0.000             | 0.000              | 0.000                | 0.000     | 0.000           | 0.000   | 0.000      | 0.000 | <div><div></div><div>10</div><div>8</div><div>6</div><div>4</div><div>2</div><div>0</div></div> |
| 0.000   | 0.000   | 0.000         | 0.000    | 0.000    | 0.000    | 0.000                   | 0.000             | 0.000              | 0.000                | 0.000     | 0.000           | 0.000   | 0.000      | 0.000 |                                                                                                 |
| 0.000   | 0.000   | 0.000         | 0.000    | 0.000    | 0.000    | 0.000                   | 0.000             | 0.000              | 0.000                | 0.000     | 0.000           | 0.000   | 0.000      | 0.000 |                                                                                                 |
| 0.000   | 0.000   | 0.000         | 0.000    | 0.000    | 0.000    | 0.000                   | 0.000             | 0.000              | 0.000                | 0.000     | 0.000           | 0.000   | 0.000      | 0.000 |                                                                                                 |
| 0.000   | 0.000   | 0.000         | 0.000    | 0.000    | 0.000    | 0.000                   | 0.000             | 0.000              | 0.000                | 0.000     | 0.000           | 0.000   | 0.000      | 0.000 |                                                                                                 |
| 0.000   | 0.000   | 0.000         | 0.000    | 0.000    | 0.000    | 0.000                   | 0.000             | 0.000              | 0.000                | 0.000     | 0.000           | 0.000   | 0.000      | 0.000 |                                                                                                 |
| 0.000   | 0.000   | 0.000         | 0.000    | 0.000    | 0.000    | 0.000                   | 0.000             | 0.000              | 0.000                | 0.000     | 0.000           | 0.000   | 0.000      | 0.000 |                                                                                                 |
| 0.000   | 0.000   | 0.000         | 0.000    | 0.000    | 0.000    | 0.000                   | 0.000             | 0.000              | 0.000                | 0.000     | 0.000           | 0.000   | 0.000      | 0.000 |                                                                                                 |
| 0.000   | 0.000   | 0.000         | 0.000    | 0.000    | 0.000    | 0.000                   | 0.000             | 0.000              | 0.000                | 0.000     | 0.000           | 0.000   | 0.000      | 0.000 |                                                                                                 |
| 0.000   | 0.000   | 0.000         | 0.000    | 0.000    | 0.000    | 0.000                   | 0.000             | 0.000              | 0.000                | 0.000     | 0.000           | 0.000   | 0.000      | 0.000 |                                                                                                 |
| GLCM M1 | GLCM M2 | Spatial Chaos | Ripley F | Ripley G | Ripley L | Spatial autocorrelation | Degree centrality | Average Clustering | Closeness centrality | Ball Hall | Barfield Rathey | C-index | Det. ratio |       |                                                                                                 |

B

TIL maps with probabilities

|         |         |               |           |                 |         |            |      |                                                                                                      |
|---------|---------|---------------|-----------|-----------------|---------|------------|------|------------------------------------------------------------------------------------------------------|
| 0.000   | 0.000   | 0.000         | 4.348     | 4.348           | 6.522   | 4.348      | acc  | <div><div></div><div>100</div><div>80</div><div>60</div><div>40</div><div>20</div><div>0</div></div> |
| 0.559   | 0.559   | 0.559         | 0.000     | 0.000           | 0.000   | 0.000      | blca |                                                                                                      |
| 0.188   | 0.188   | 0.188         | 0.846     | 0.940           | 1.316   | 0.846      | brca |                                                                                                      |
| 0.000   | 0.000   | 0.000         | 0.377     | 0.377           | 0.755   | 0.377      | cesc |                                                                                                      |
| 0.461   | 0.461   | 0.461         | 9.677     | 9.677           | 9.908   | 9.677      | coad |                                                                                                      |
| 0.000   | 0.000   | 0.000         | 0.000     | 0.000           | 0.000   | 0.000      | esca |                                                                                                      |
| 0.000   | 0.000   | 0.000         | 0.446     | 0.446           | 0.670   | 0.446      | hnsc |                                                                                                      |
| 0.000   | 0.000   | 0.000         | 0.000     | 0.000           | 0.000   | 0.000      | kirc |                                                                                                      |
| 0.000   | 0.000   | 0.000         | 0.549     | 0.549           | 1.099   | 0.549      | lihc |                                                                                                      |
| 0.214   | 0.214   | 0.214         | 0.214     | 0.214           | 0.642   | 0.214      | luad |                                                                                                      |
| 1.037   | 1.037   | 1.037         | 0.000     | 0.000           | 0.000   | 0.000      | lusc | <div><div></div><div>100</div><div>80</div><div>60</div><div>40</div><div>20</div><div>0</div></div> |
| 100.000 | 100.000 | 1.149         | 1.149     | 1.149           | 3.448   | 100.000    | meso |                                                                                                      |
| 0.000   | 0.000   | 0.000         | 0.943     | 0.943           | 3.774   | 0.943      | ov   |                                                                                                      |
| 100.000 | 100.000 | 0.000         | 0.000     | 0.000           | 0.000   | 100.000    | paad |                                                                                                      |
| 0.000   | 0.000   | 0.000         | 2.500     | 2.500           | 2.500   | 2.500      | prad |                                                                                                      |
| 0.641   | 0.641   | 0.641         | 0.641     | 0.641           | 0.641   | 0.641      | read |                                                                                                      |
| 0.000   | 0.000   | 0.000         | 0.392     | 0.392           | 0.784   | 0.392      | sarc |                                                                                                      |
| 0.231   | 0.231   | 0.231         | 0.231     | 0.231           | 0.693   | 0.231      | skcm |                                                                                                      |
| 0.000   | 0.000   | 0.000         | 0.270     | 0.270           | 0.539   | 0.270      | stad |                                                                                                      |
| 10.738  | 10.738  | 10.738        | 0.000     | 0.000           | 0.000   | 0.000      | tgct |                                                                                                      |
| 0.000   | 0.000   | 0.000         | 0.000     | 0.000           | 0.000   | 0.000      | thym | <div><div></div><div>100</div><div>80</div><div>60</div><div>40</div><div>20</div><div>0</div></div> |
| 0.000   | 0.000   | 0.000         | 0.000     | 0.000           | 0.000   | 0.000      | ucec |                                                                                                      |
| 0.000   | 0.000   | 0.000         | 0.000     | 0.000           | 0.000   | 0.000      | uvm  |                                                                                                      |
| 0.000   | 0.000   | 0.000         | 0.000     | 0.000           | 0.000   | 0.000      |      |                                                                                                      |
| 0.000   | 0.000   | 0.000         | 0.000     | 0.000           | 0.000   | 0.000      |      |                                                                                                      |
| 0.000   | 0.000   | 0.000         | 0.000     | 0.000           | 0.000   | 0.000      |      |                                                                                                      |
| 0.000   | 0.000   | 0.000         | 0.000     | 0.000           | 0.000   | 0.000      |      |                                                                                                      |
| 0.000   | 0.000   | 0.000         | 0.000     | 0.000           | 0.000   | 0.000      |      |                                                                                                      |
| 0.000   | 0.000   | 0.000         | 0.000     | 0.000           | 0.000   | 0.000      |      |                                                                                                      |
| 0.000   | 0.000   | 0.000         | 0.000     | 0.000           | 0.000   | 0.000      |      |                                                                                                      |
| GLCM M1 | GLCM M2 | Spatial Chaos | Ball Hall | Barfield Rathey | C-index | Det. ratio |      |                                                                                                      |
