# Supplementary material for: Quantifying Spatial Heterogeneity of Tumor-Infiltrating Lymphocytes to Predict Survival of Individual Cancer Patients
Source: MDPI journal article supplement (doi:10.3390/jpm12071113), 2022-07-07

A RawTIL map

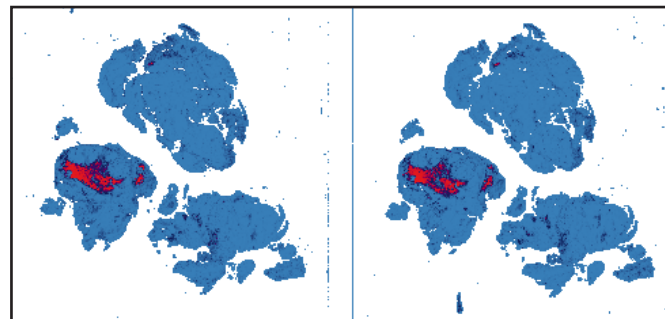

B After removing vertical artifact line

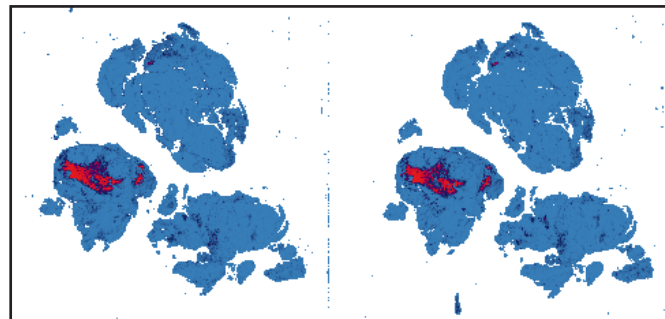

C Region 1

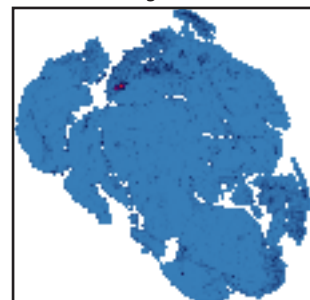

Region 3

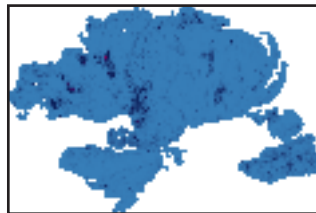

Region 4

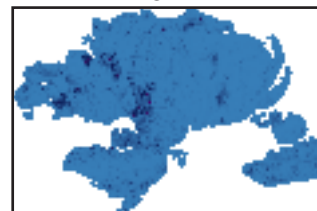

Region 2

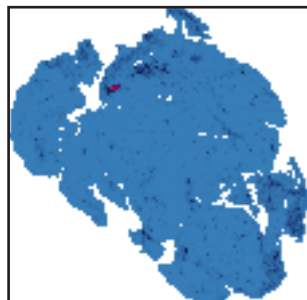

Region 5

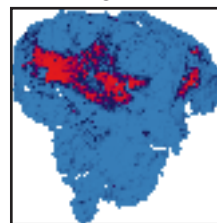

Region 6

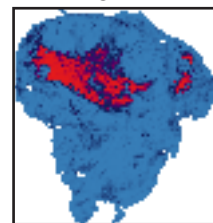

Supplement: s1 [file s1]
