# Supplementary figures and images for: Quantifying Spatial Heterogeneity of Tumor-Infiltrating Lymphocytes to Predict Survival of Individual Cancer Patients
Source: MDPI journal article supplement (doi:10.3390/jpm12071113), 2022-07-07

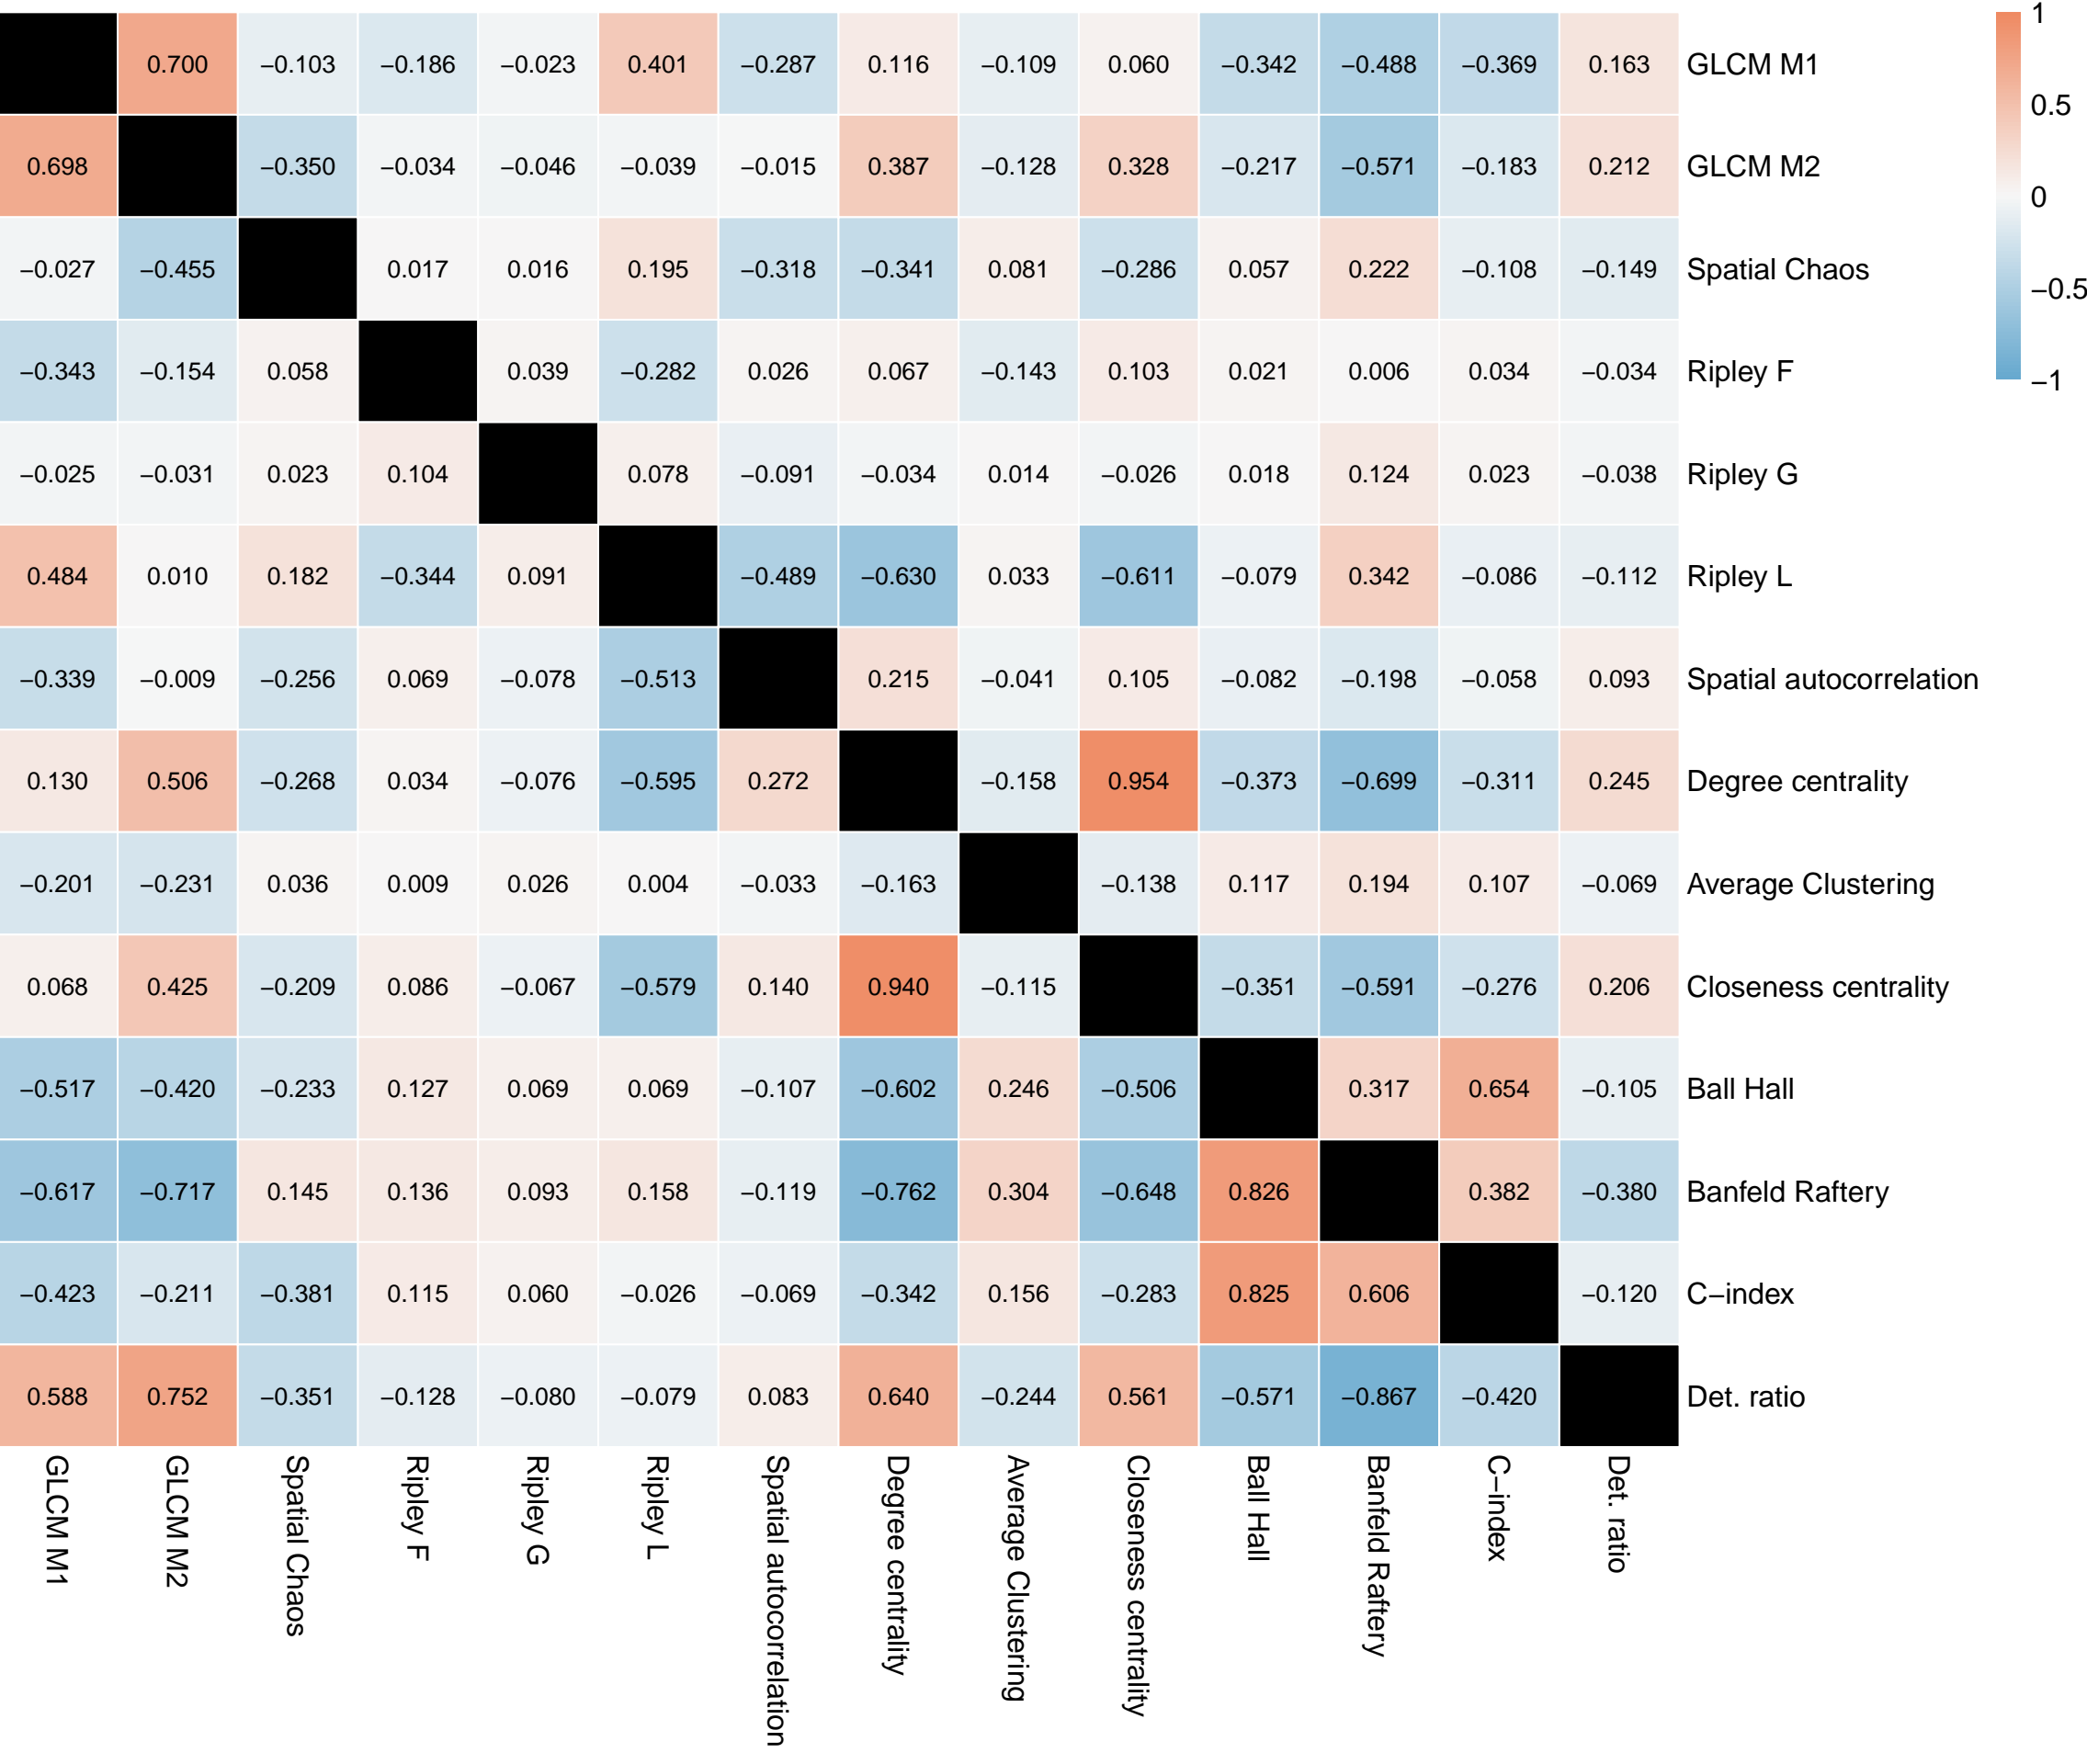

Supplement: s1 [file s1]

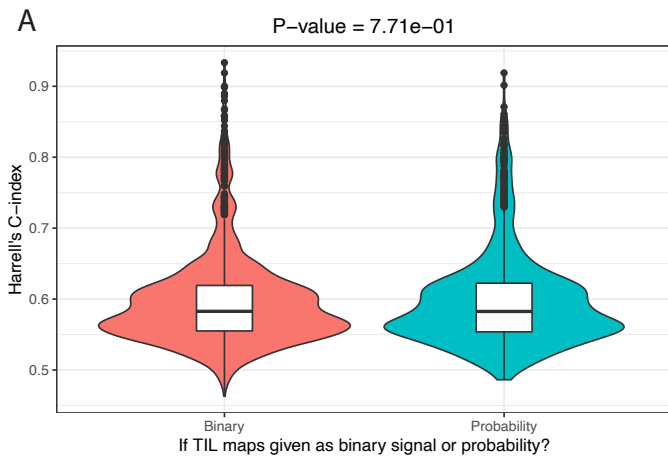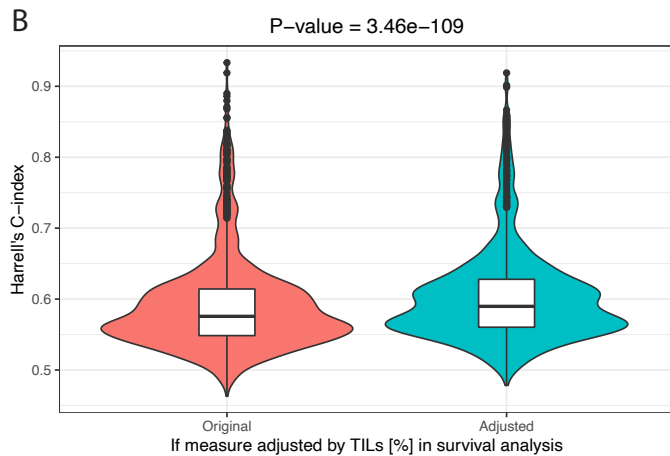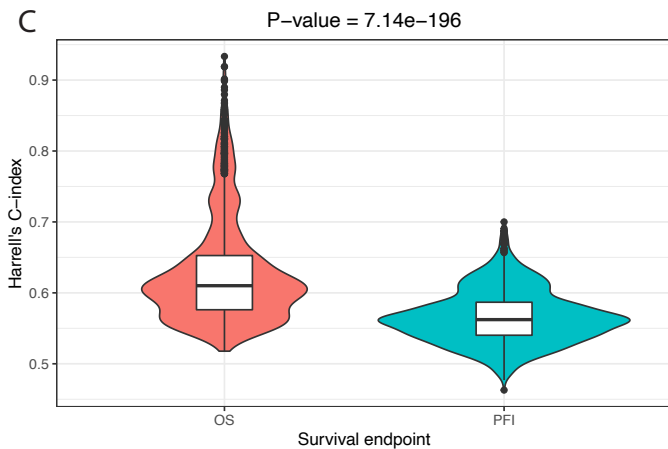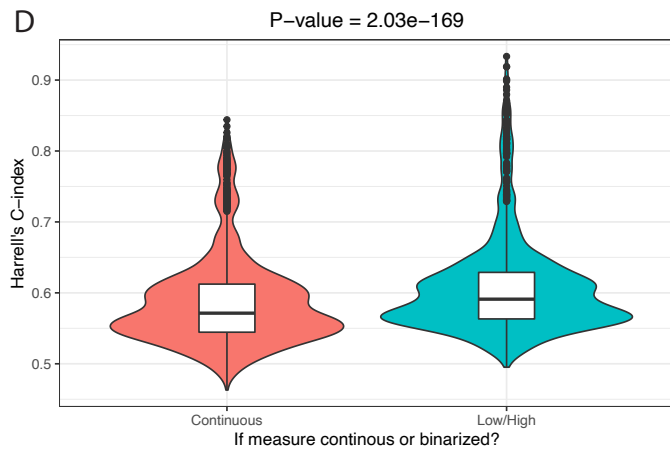

Supplement: s1 [file s1]

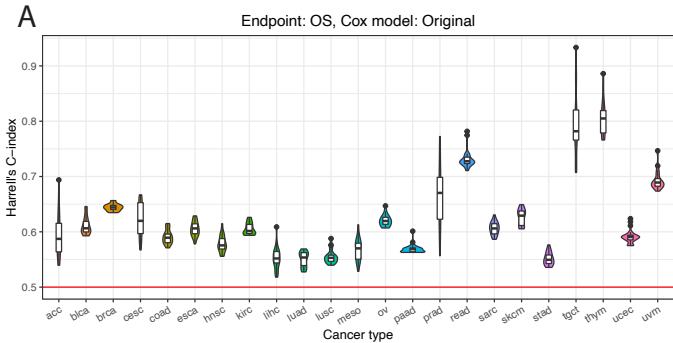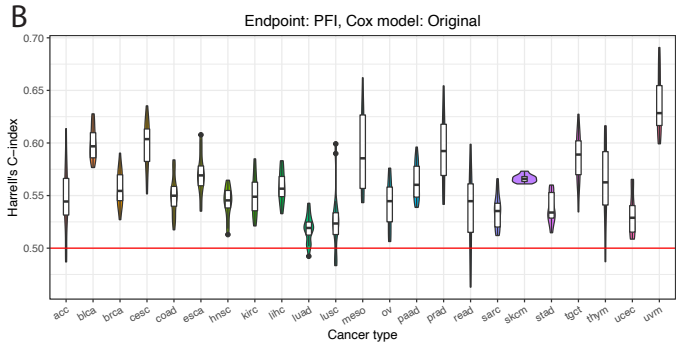

Supplement: s1 [file s1]

A

Endpoint: OS, Cox model: Original

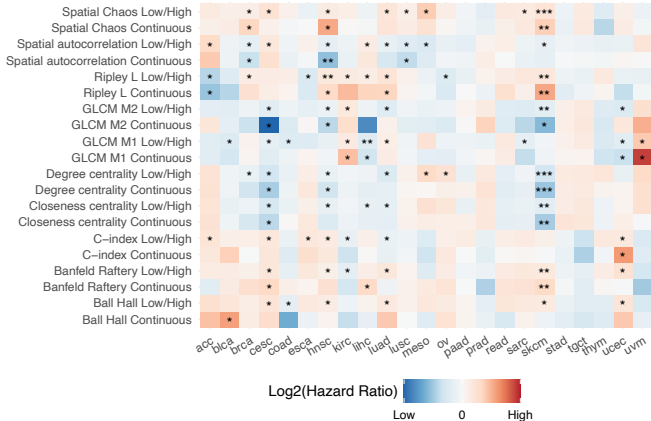

B

Endpoint: PFI, Cox model: Original

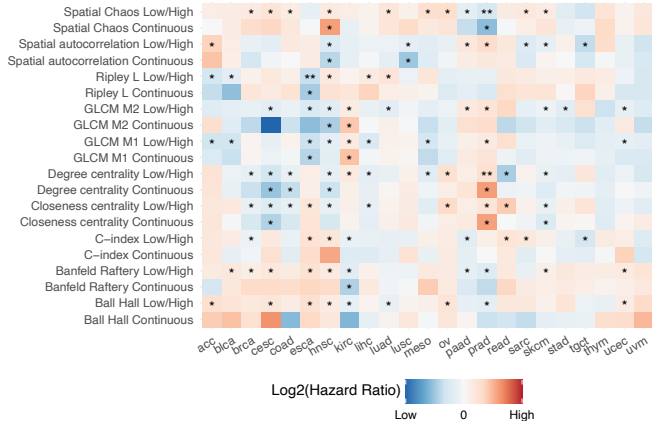

Supplement: s1 [file s1]

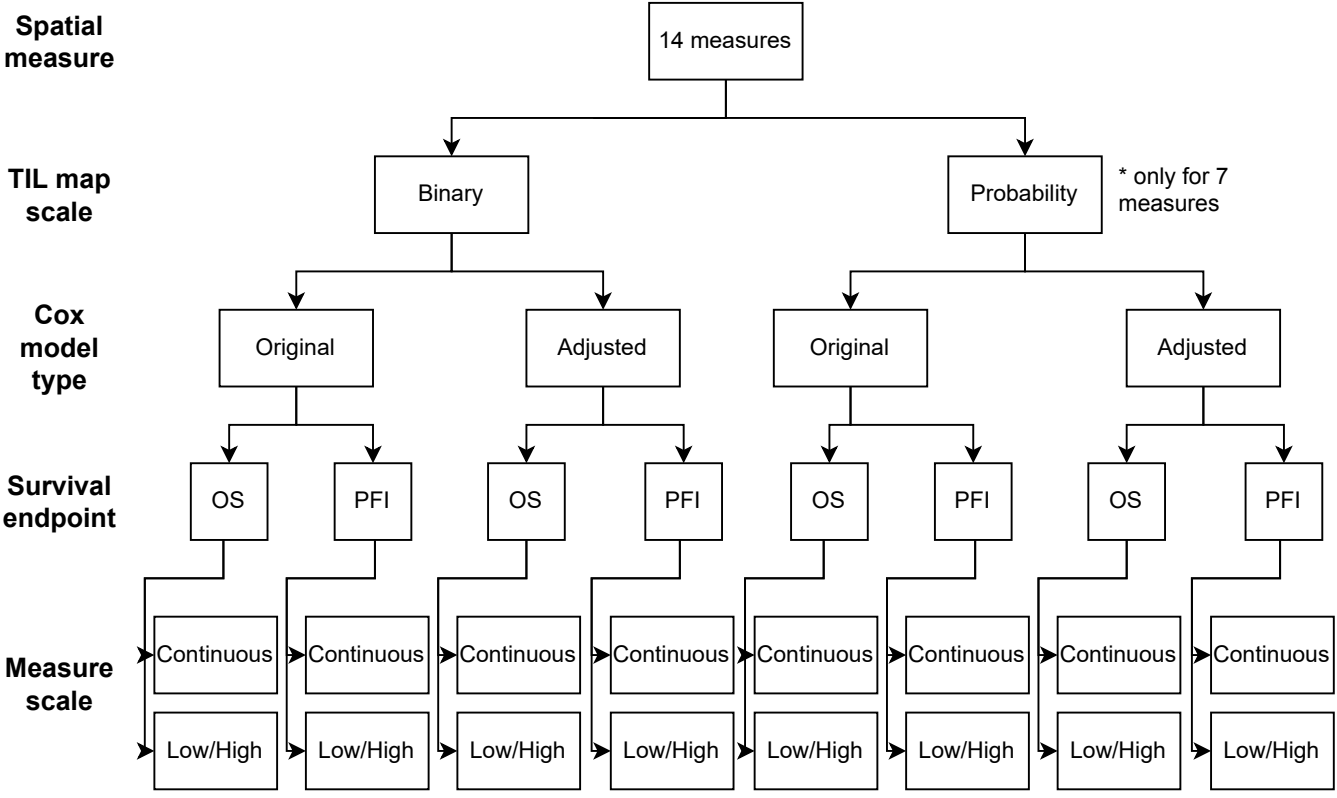

Supplement: s1 [file s1]
